# Supplementary material
Source: publisher figshare collection journal article supplement (https://gsajournals.figshare.com/ndownloader/files/13991156)
Supplement: Supplementary file 1 [file 13991156]

## Sheet: TableS7
Table S7 Assessing the gene region assembly by RNA sequencing and assembly.
Tissue	Number	Total Length(bp)	Covered by Assembly (%)	With > 90% Sequence in one Scaffold			With > 50% Sequence in one Scaffold
				Number	Percent (%)		Number	Percent (%)
Root	63732	50648335	95.26	53595	84.09		60500	94.93
Fruit	52115	38321670	95.09	44793	85.95		49027	94.07
Phloem	51924	38761789	95	43721	84.2		48649	93.69
Leaf	67325	50554450	95.76	57729	85.75		64463	95.75
Average	58774	44571561	95	49960	85		55660	95
Total	235096	178286244	-	199838	-		222639	-
